# Supplementary material
Source: ML conference proceedings conference paper supplement (https://openreview.net/forum?id=KqR3rgooXb)

$1/\tau = 10.0$

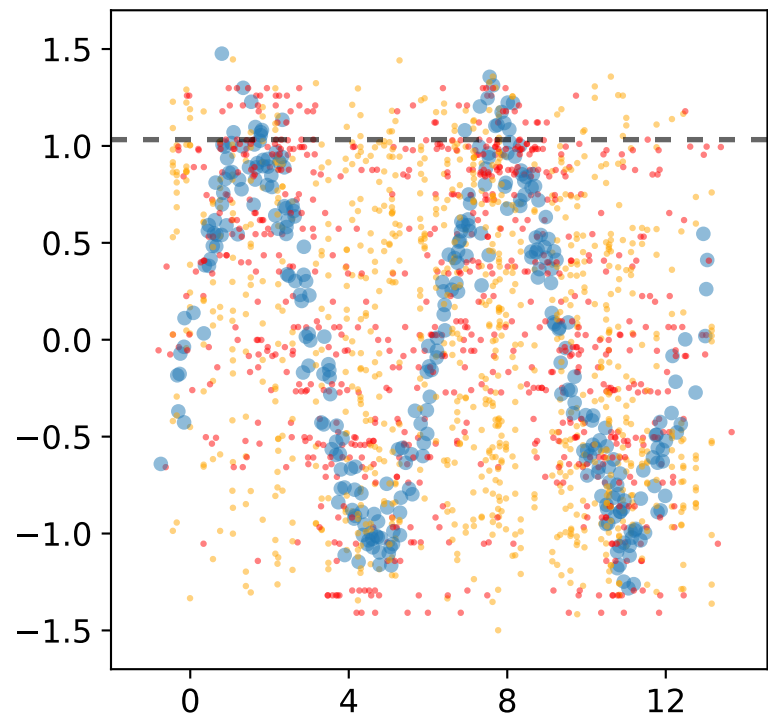

$1/\tau = 500.0$

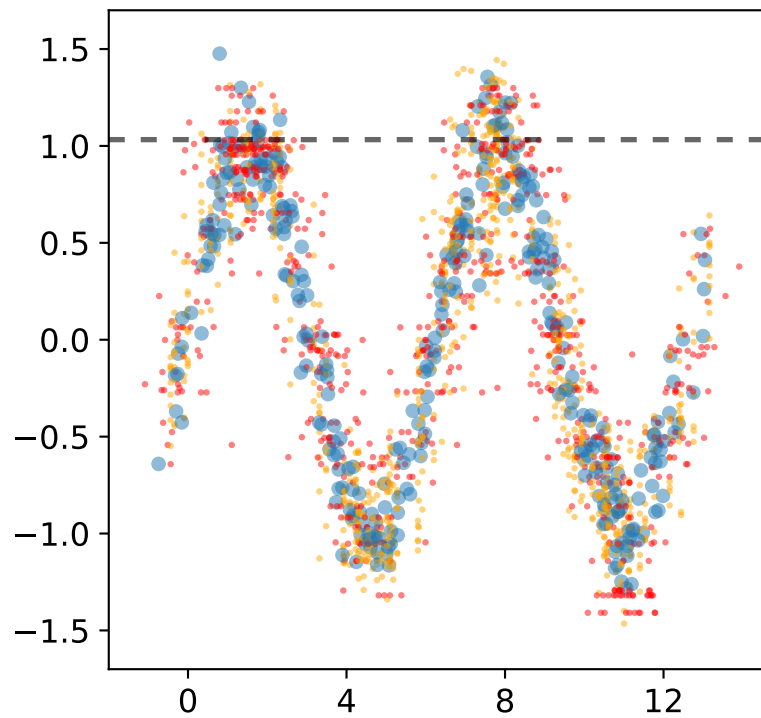

$1/\tau = 25000.0$

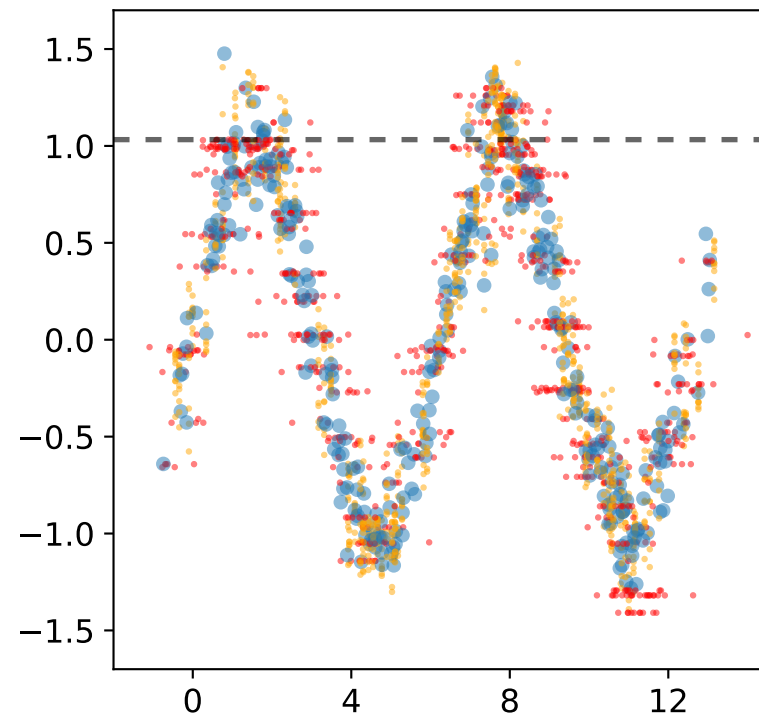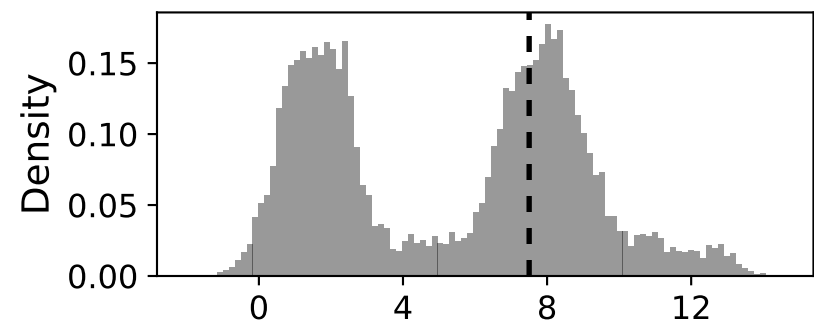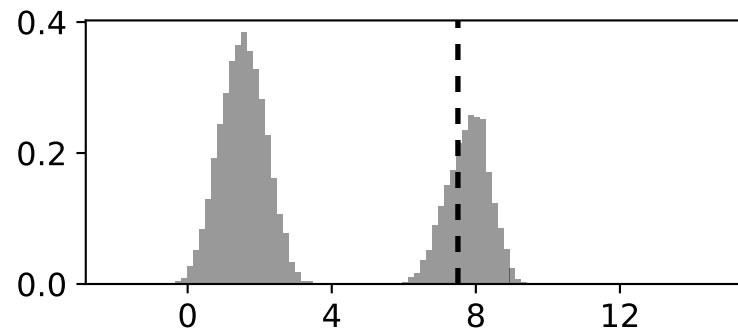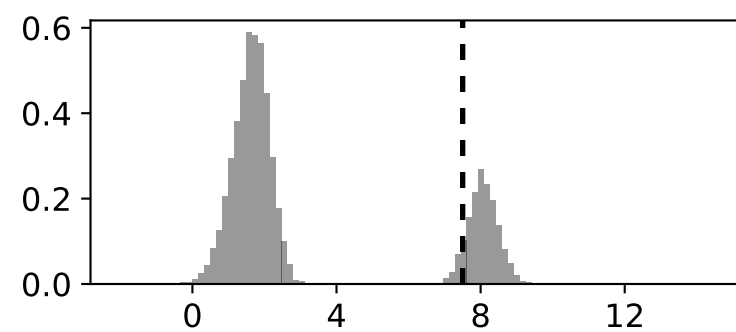

Supplement: supplementary_material [file attachment]

# NRMSE rankings

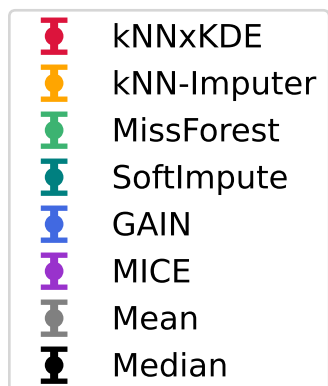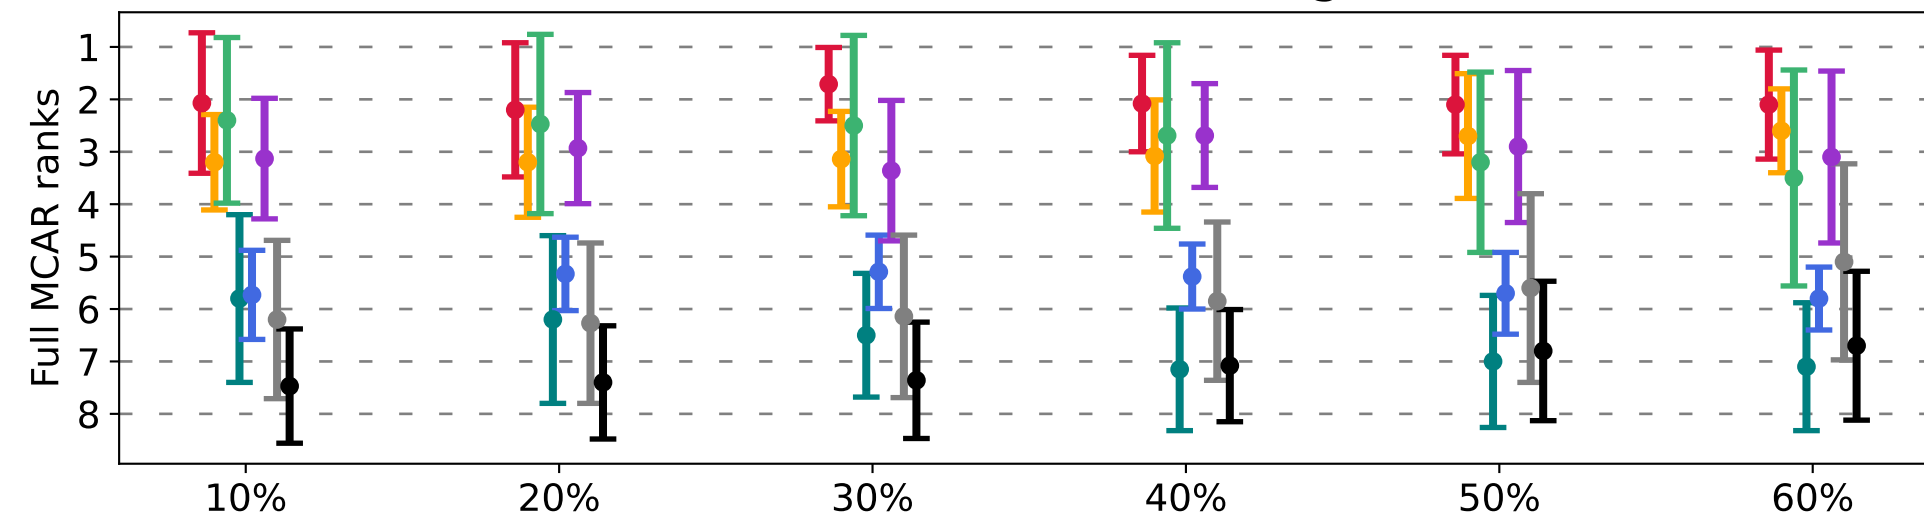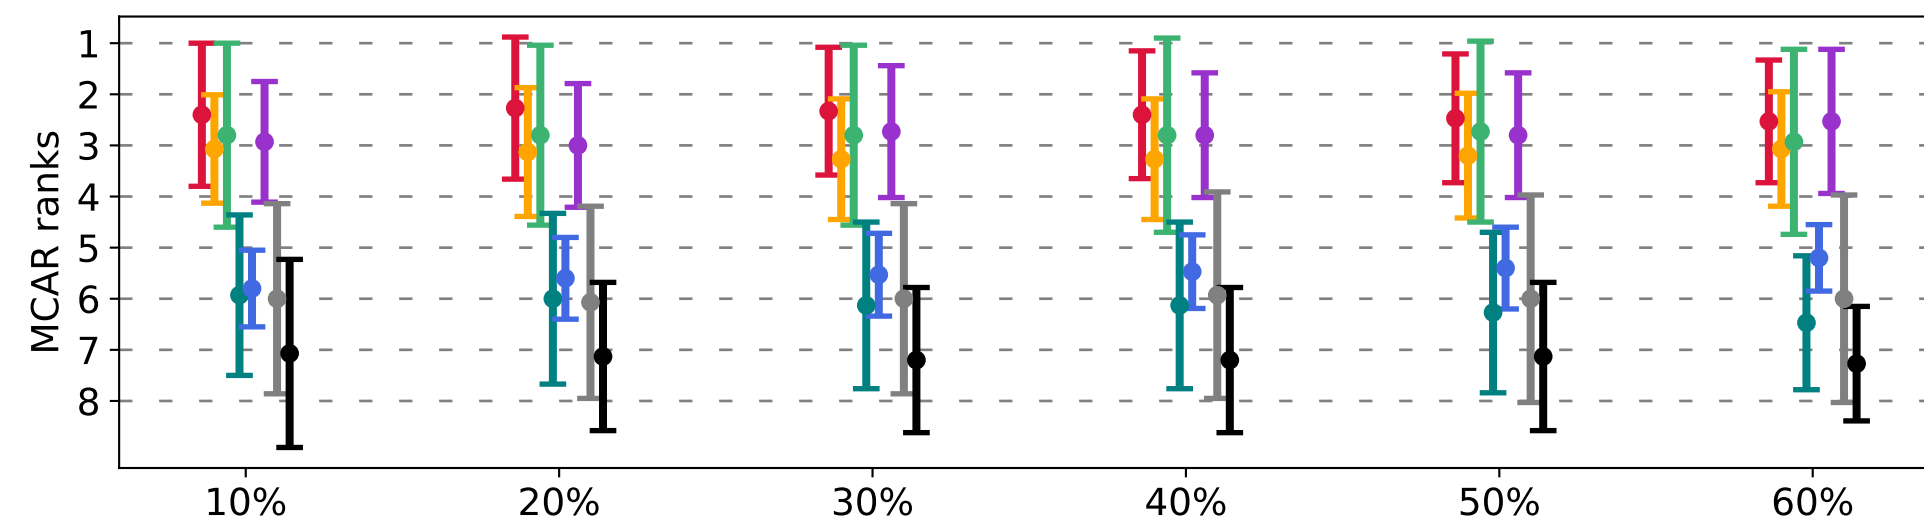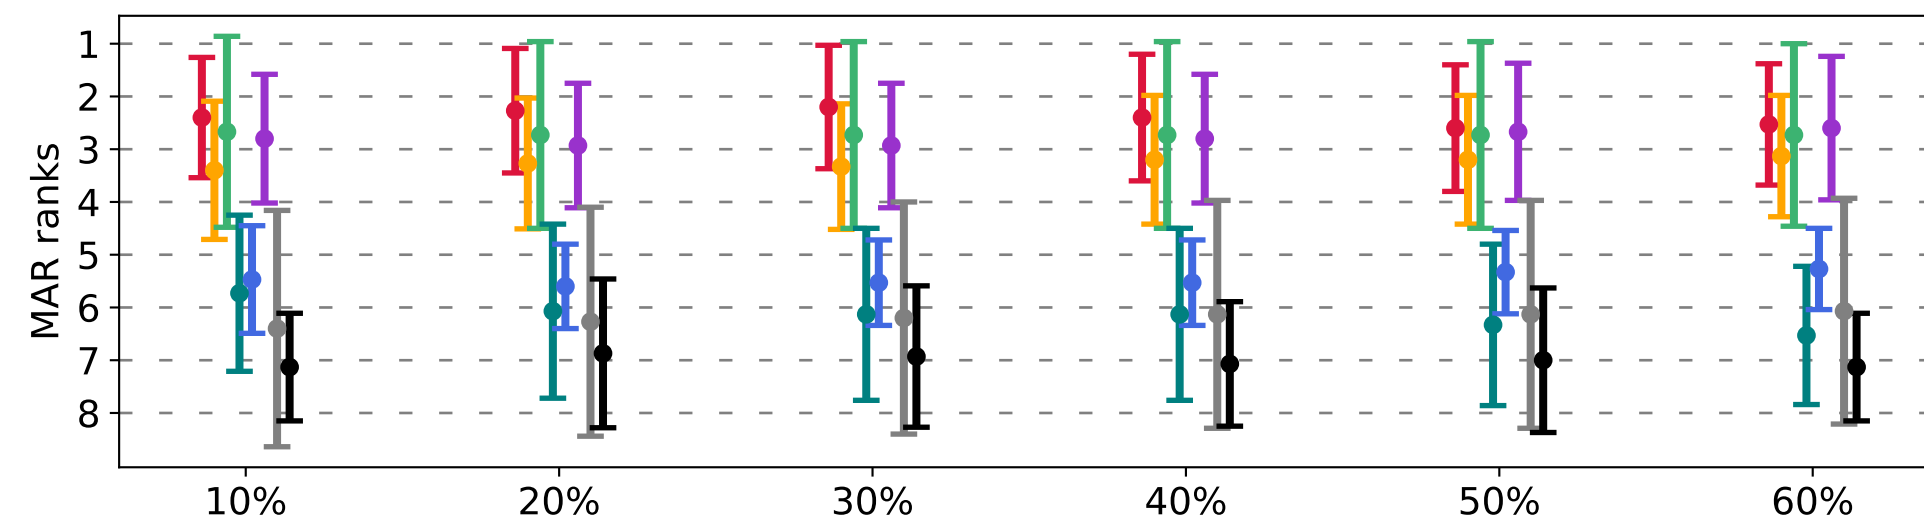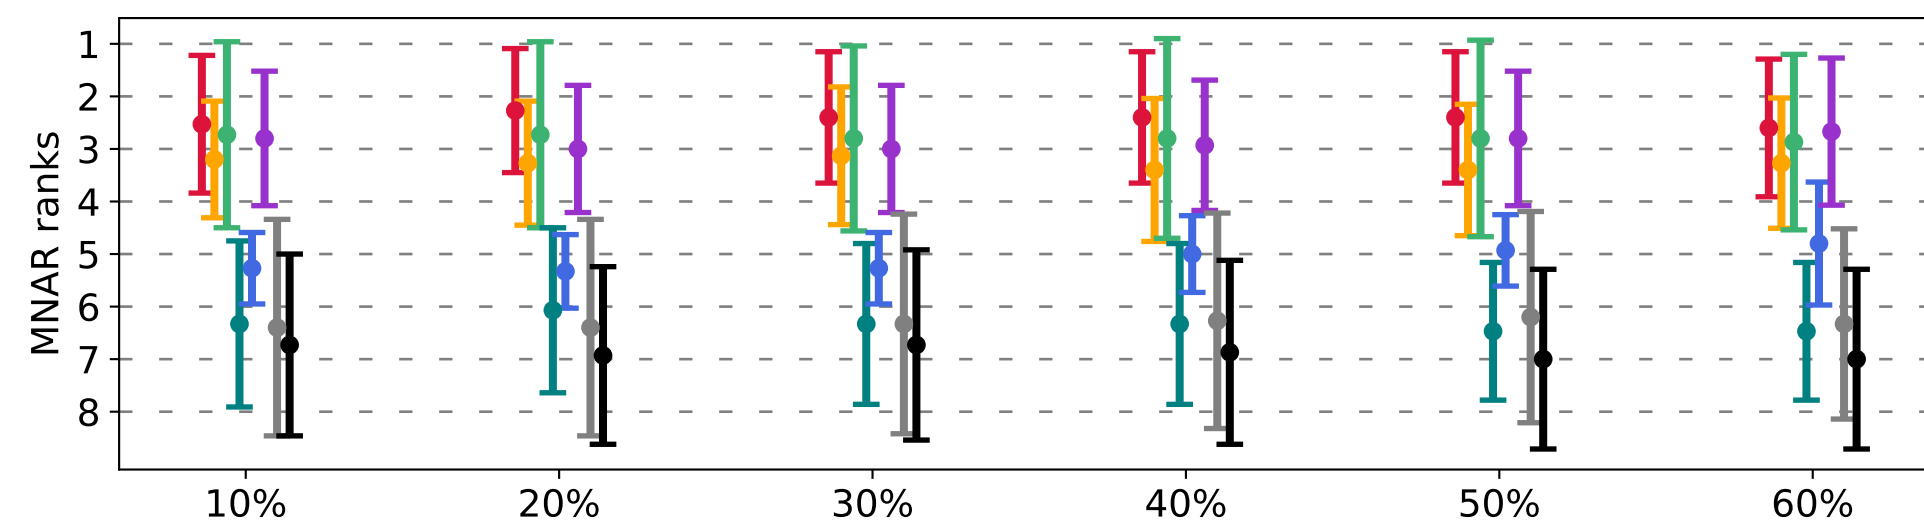

Missing rate

Supplement: supplementary_material [file attachment]

# Log-likelihood rankings

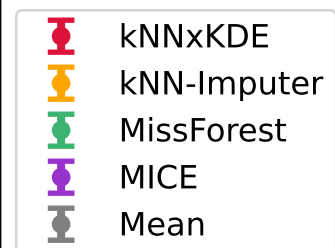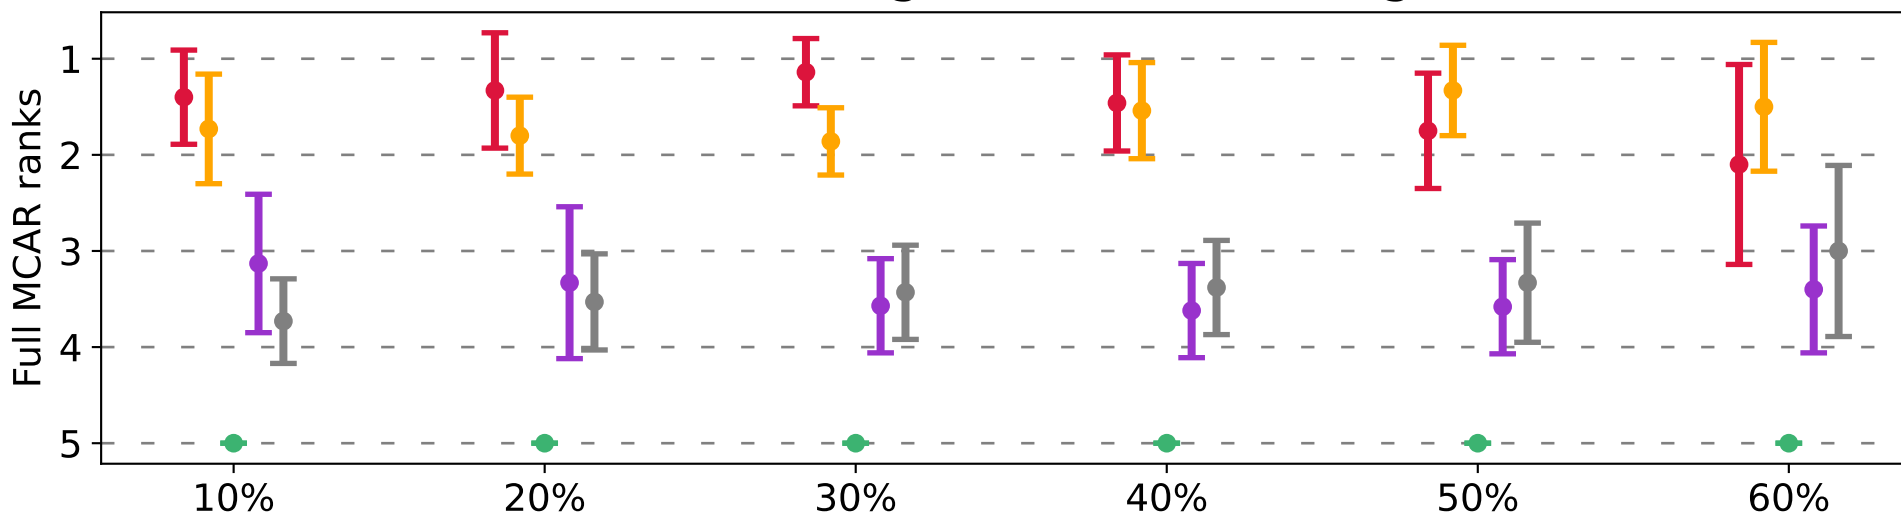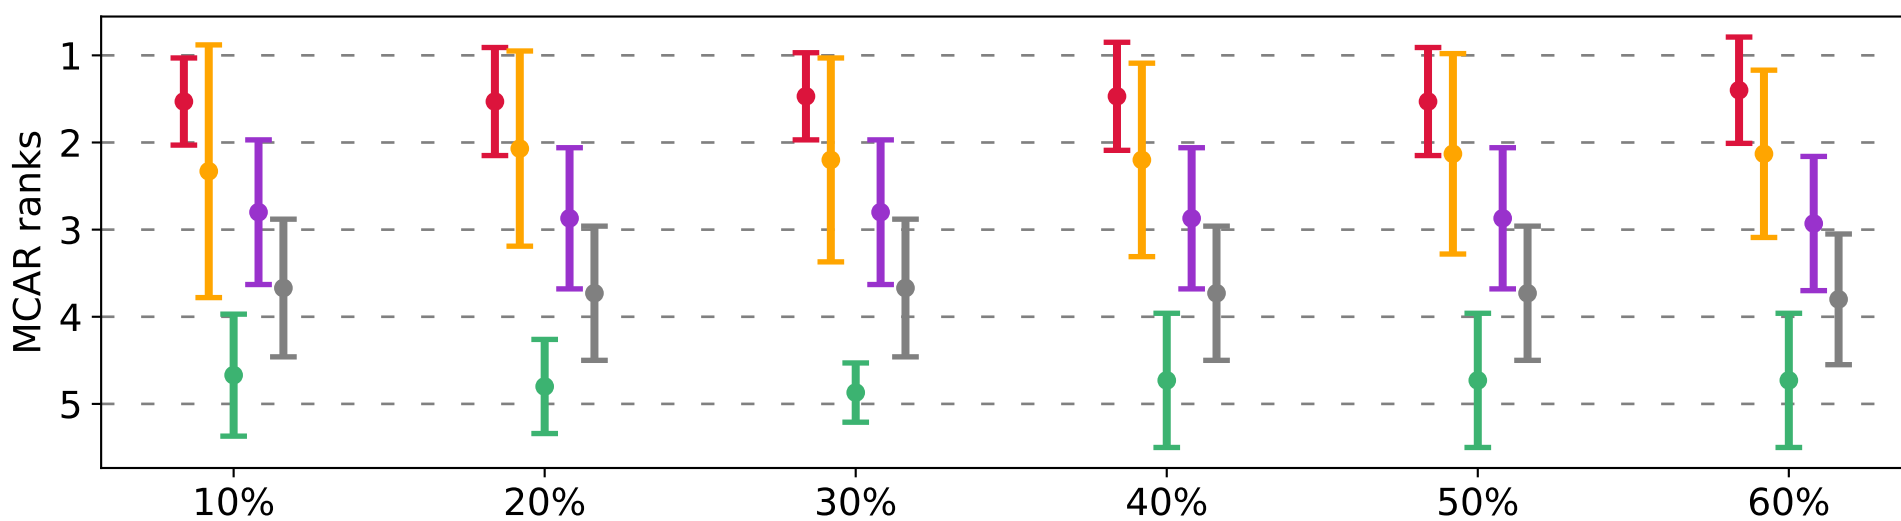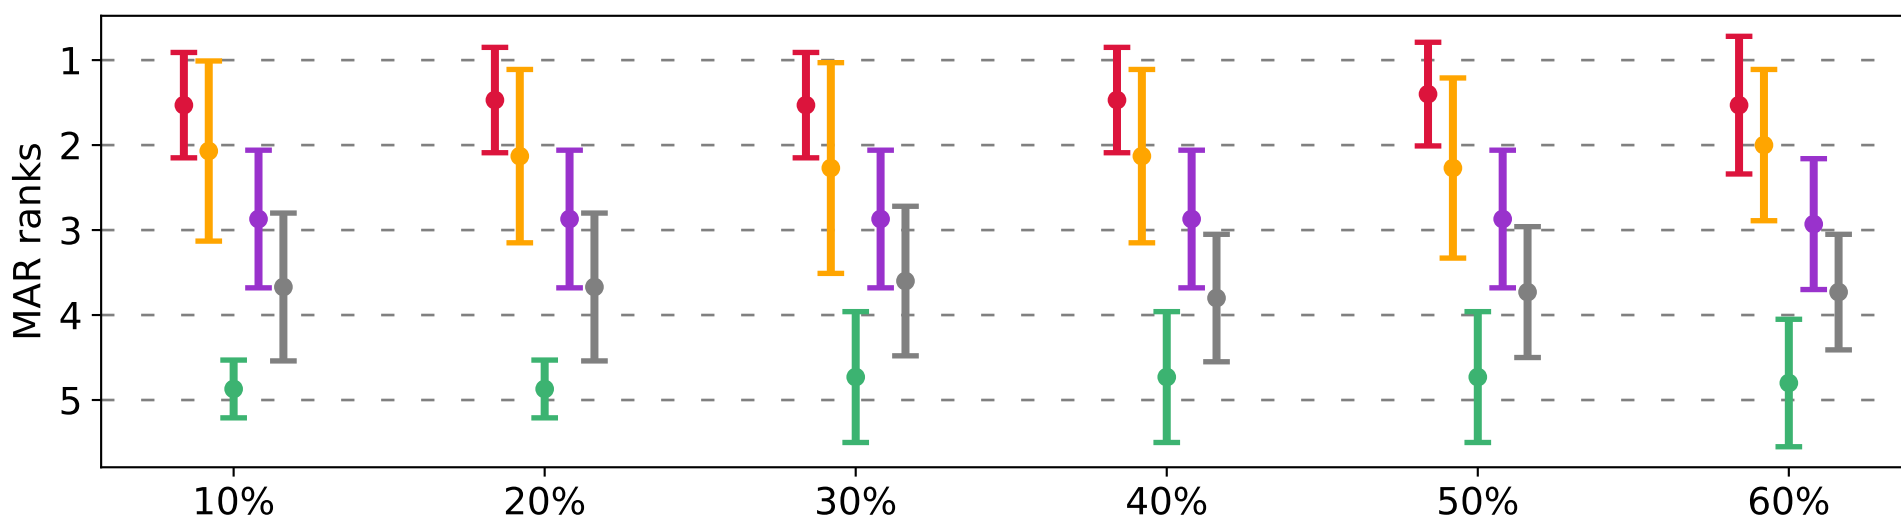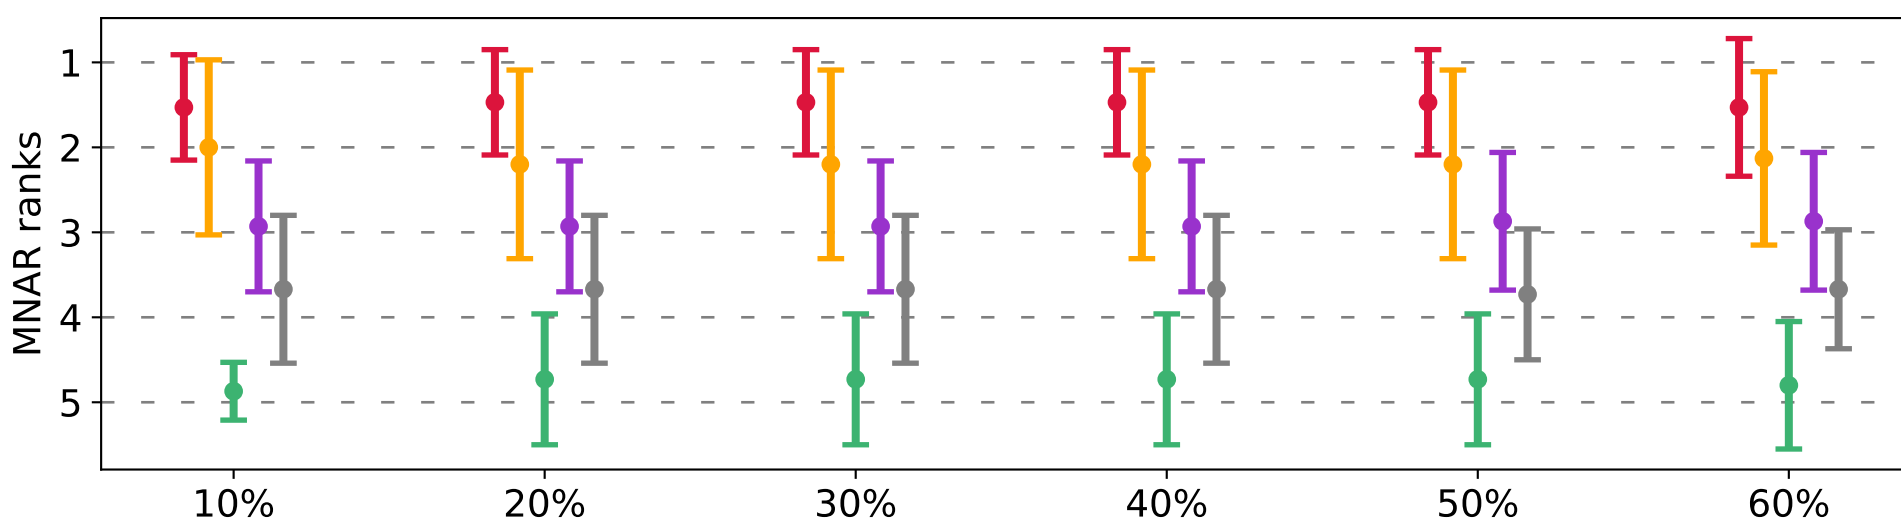

Missing rate

Supplement: supplementary_material [file attachment]

2d\_linear

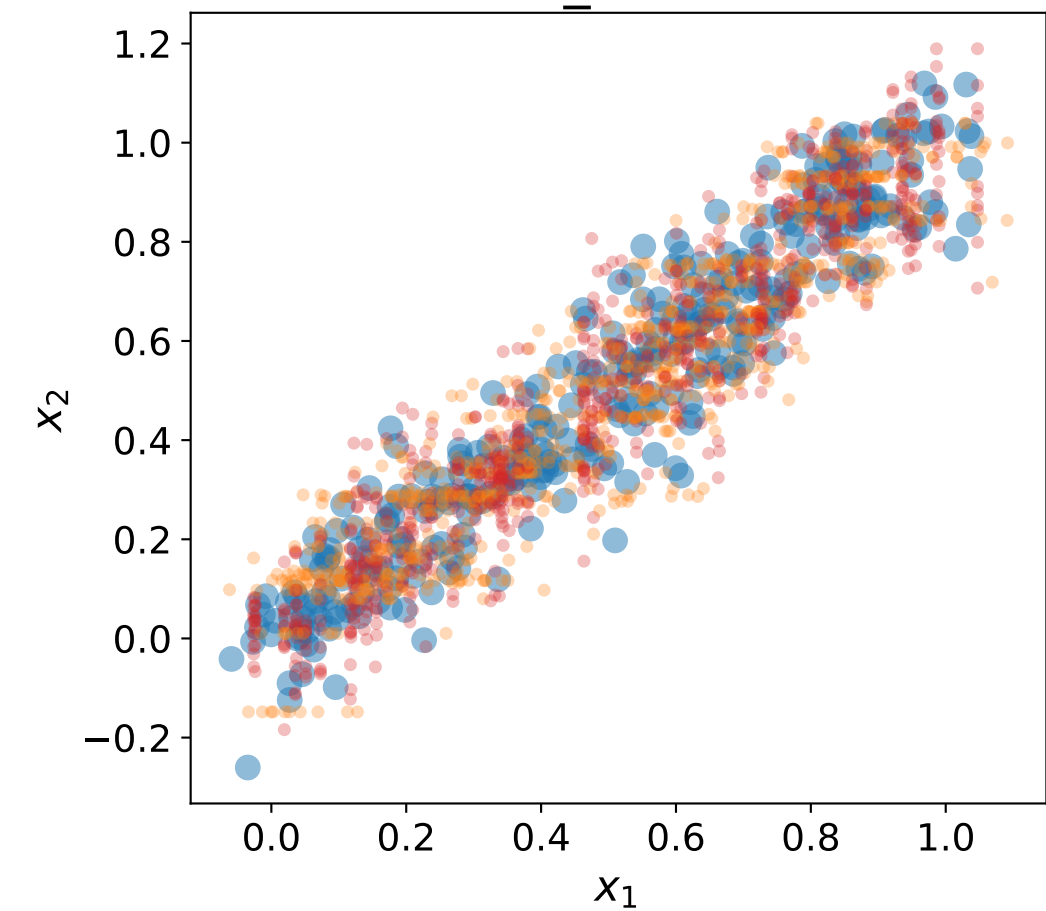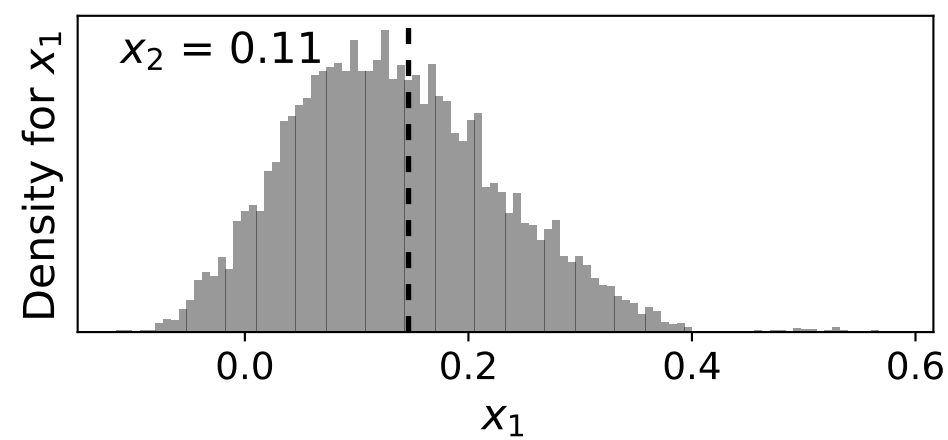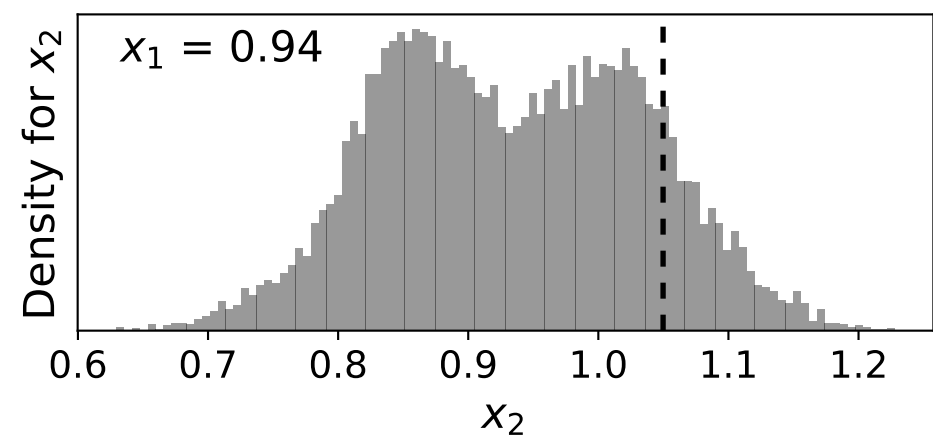

2d\_sine

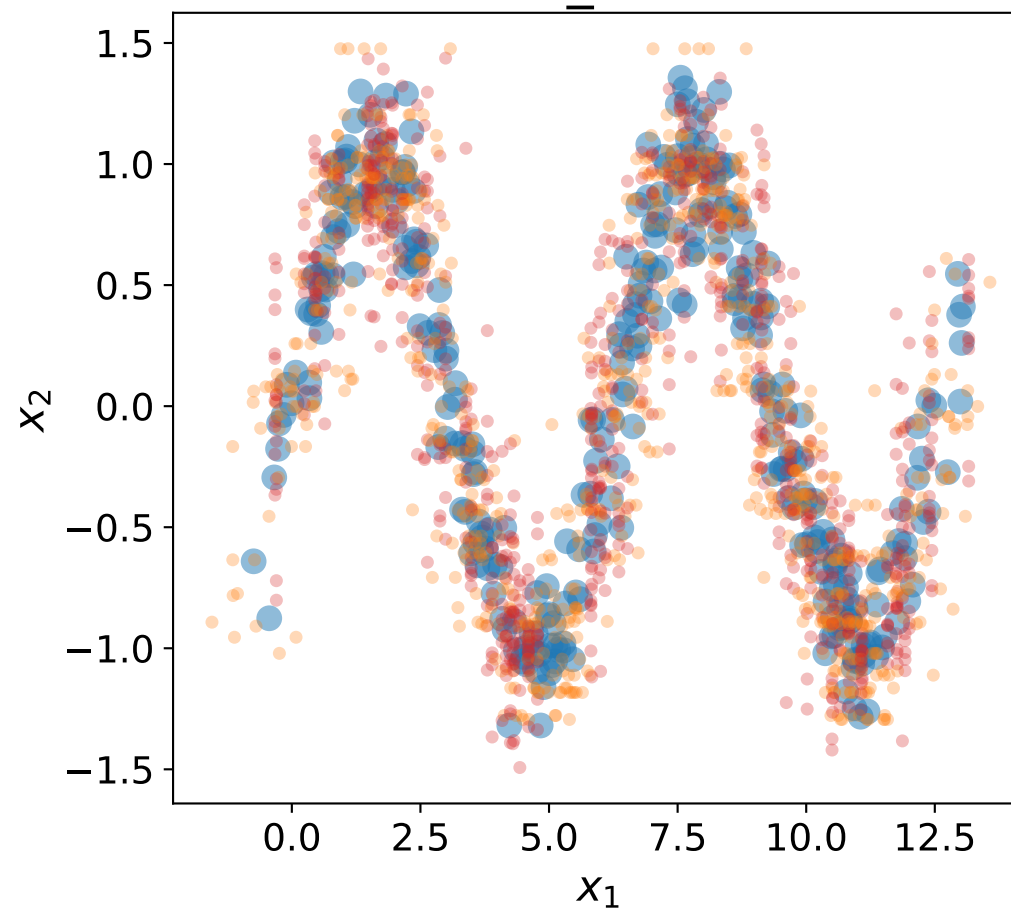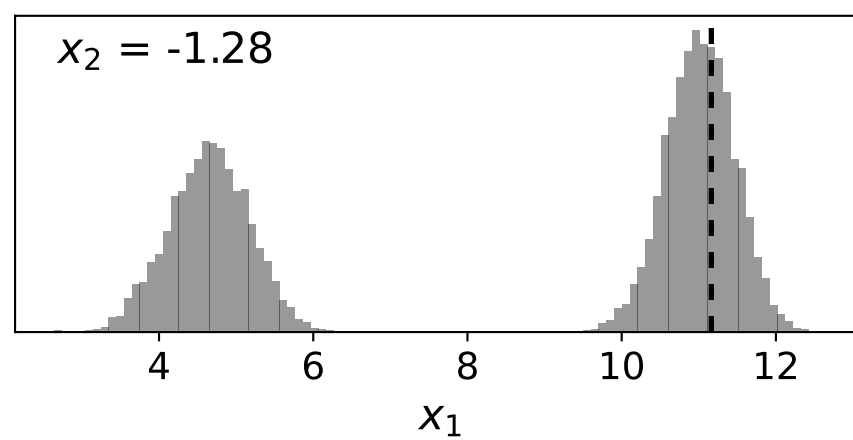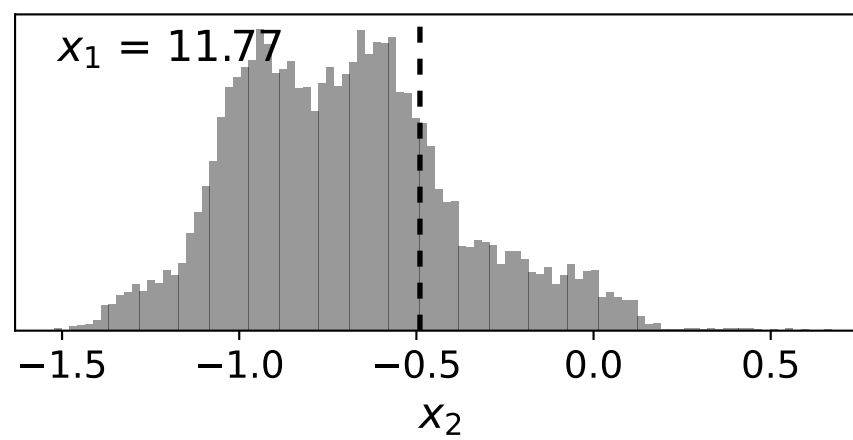

2d\_ring

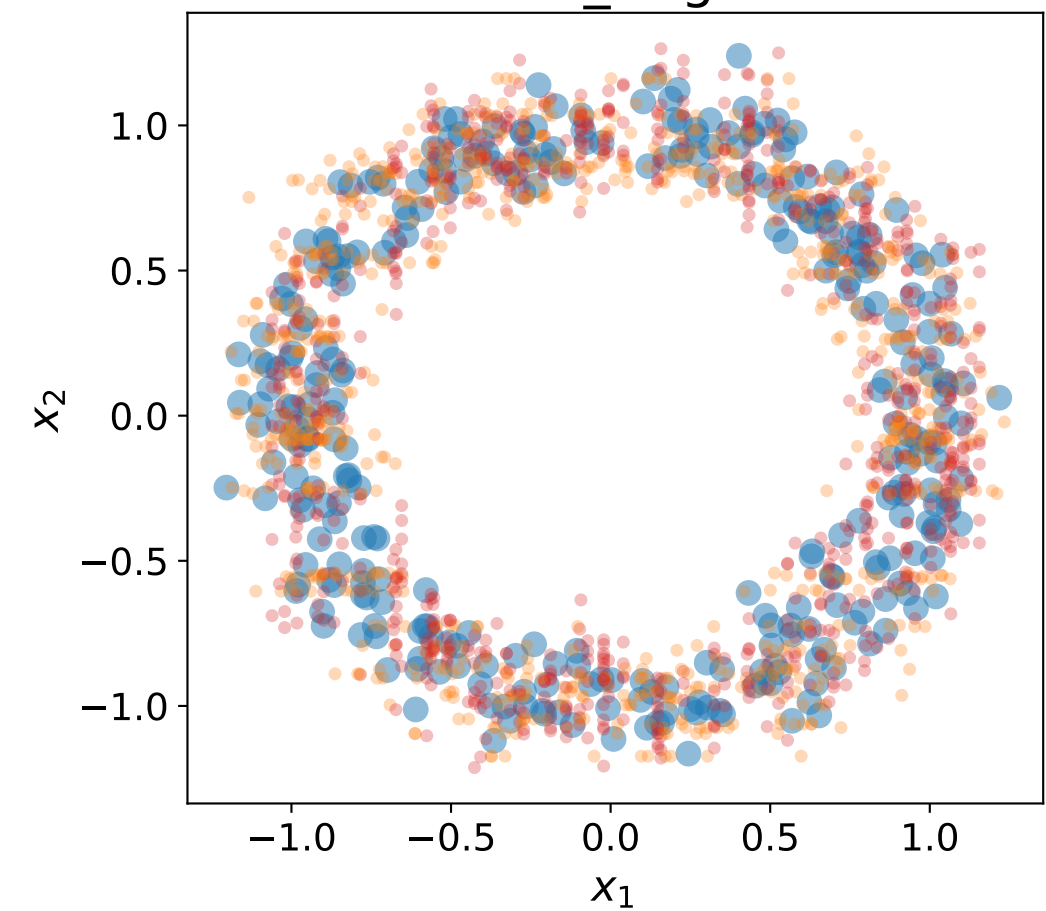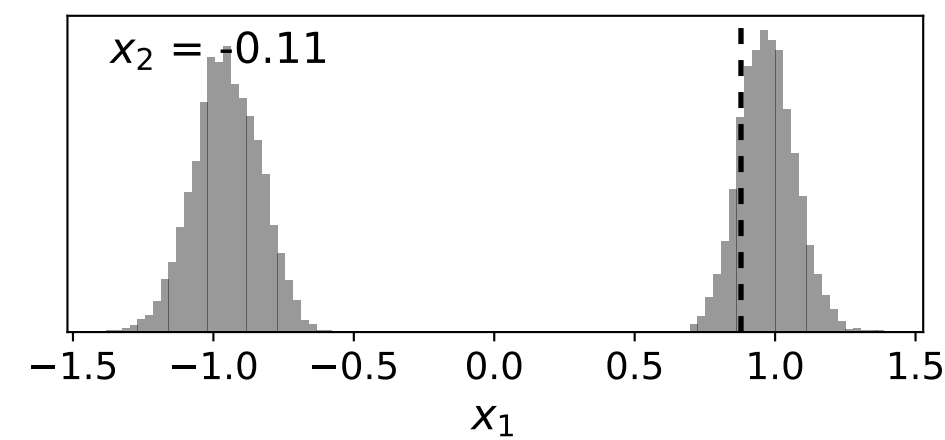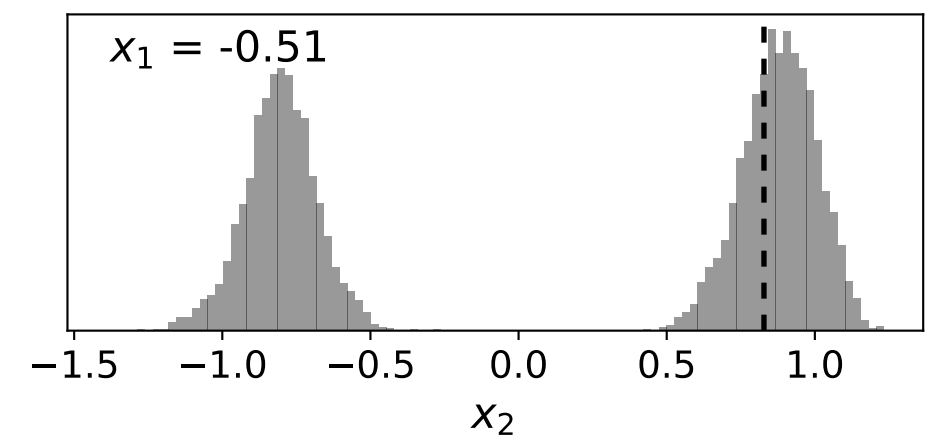

Supplement: supplementary_material [file attachment]

2d\_linear

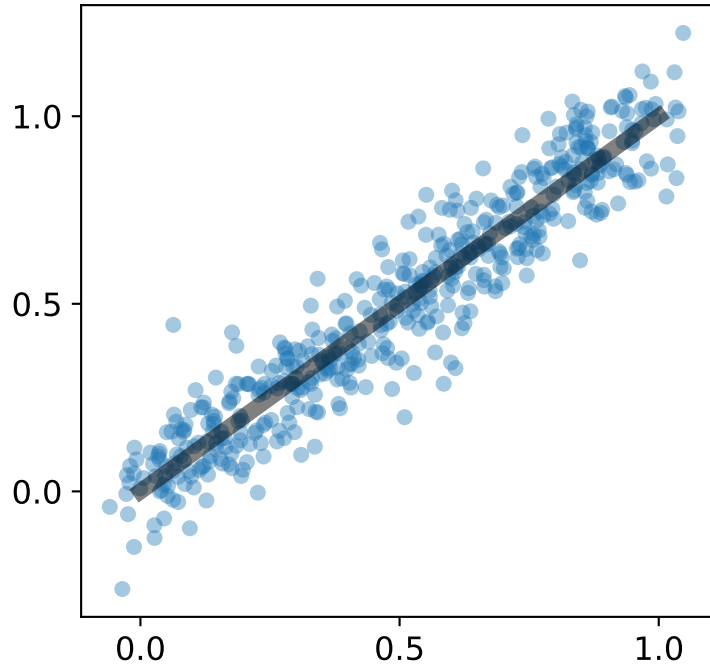

2d\_sine

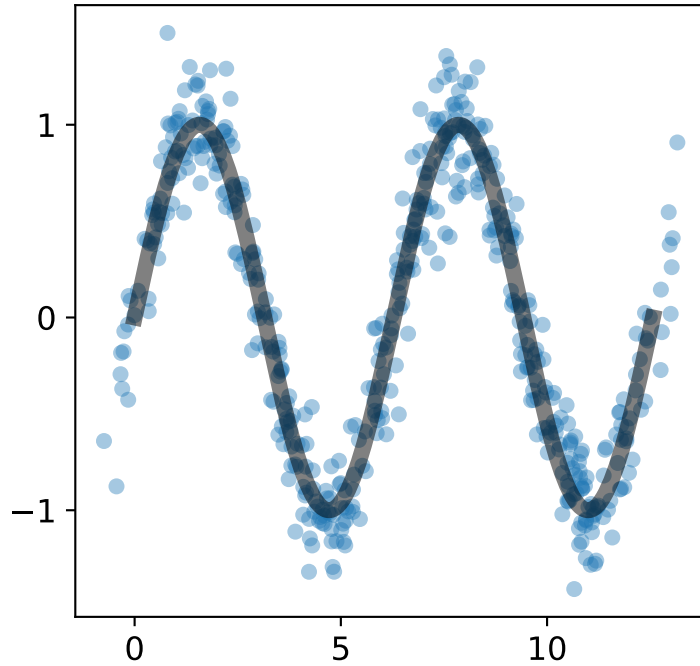

2d\_ring

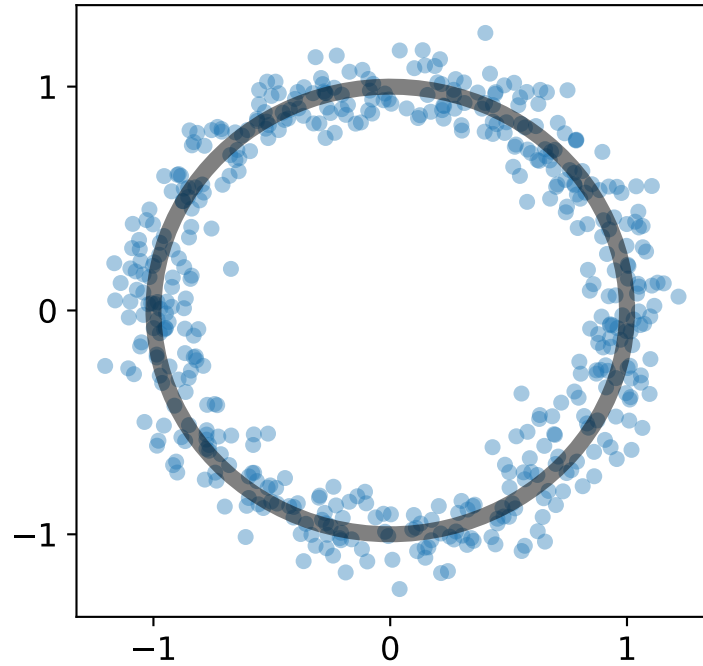

Supplement: supplementary_material [file attachment]

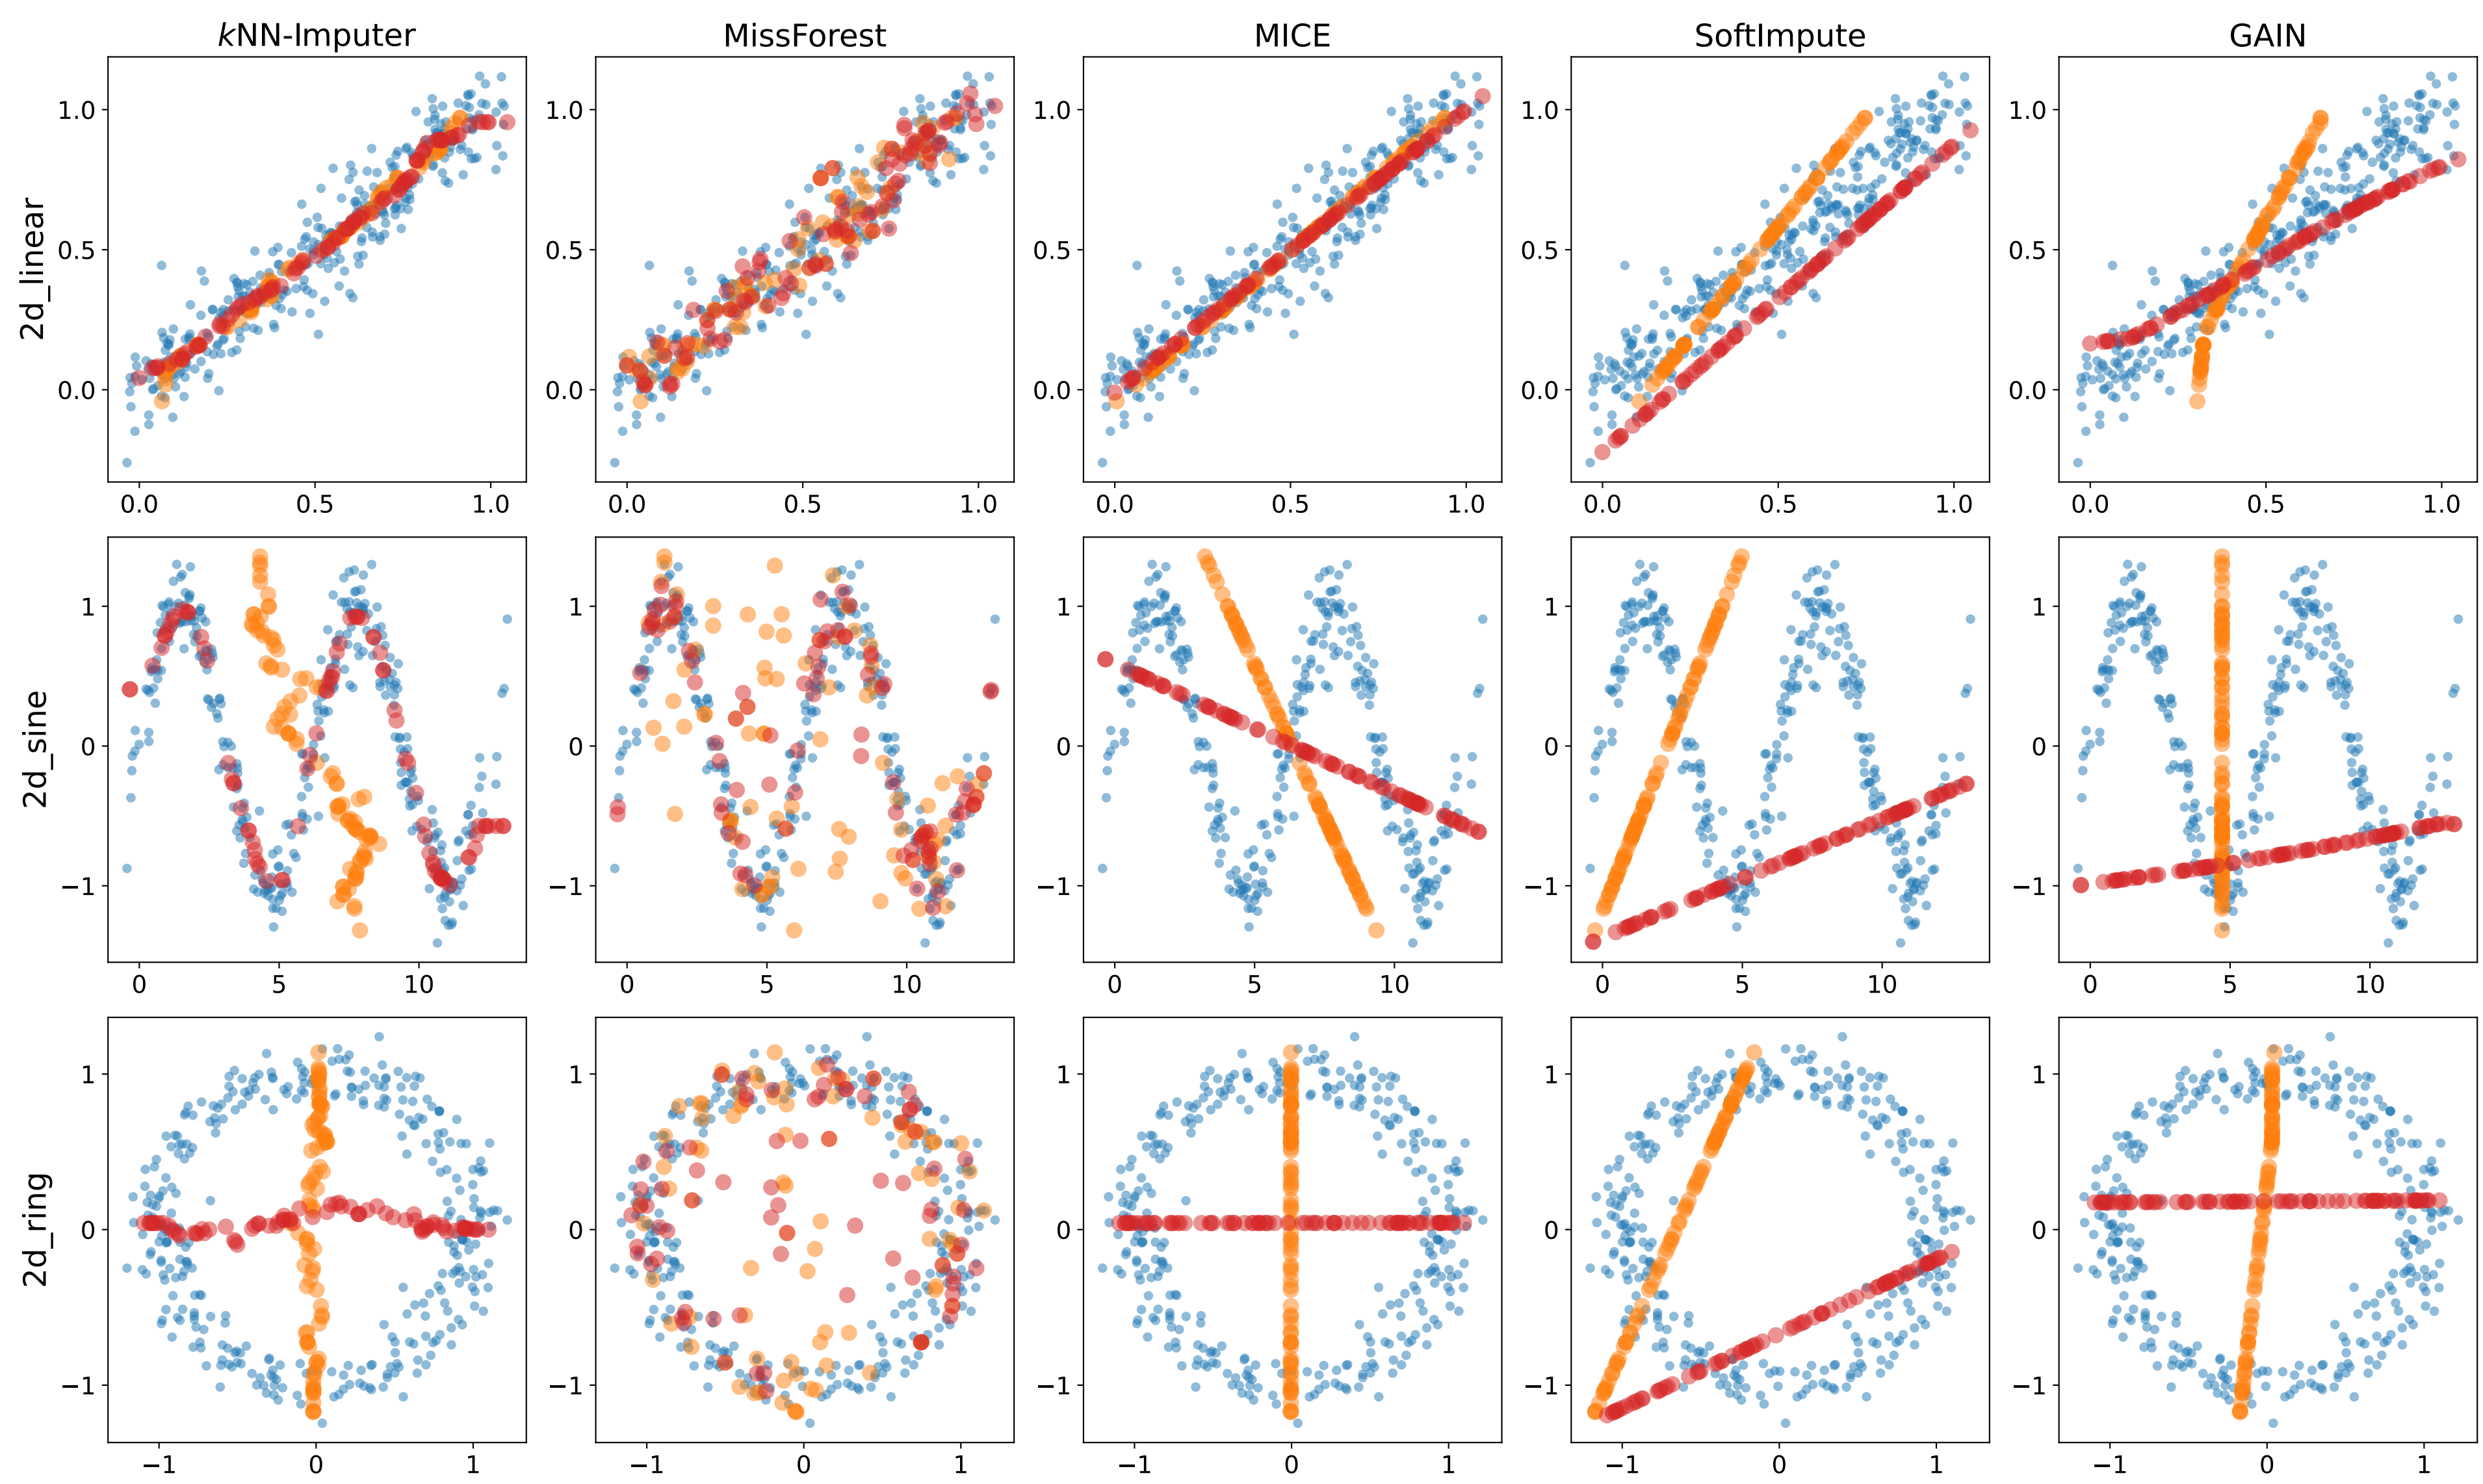

Supplement: supplementary_material [file attachment]
